# Supplementary material for: Amyloid Deposits in a Functionally Unicuspid Stenotic Aortic Valve
Source: PubMed Central journal article supplement — CJC Open. 2022 Sep 22;4(12):1069–73. doi: 10.1016/j.cjco.2022.09.002 (PMC9764129; doi:10.1016/j.cjco.2022.09.002), 2022-09-22

## **Supplemental material**

### **Amyloid Deposits in a Functionally Unicuspid Stenotic Aortic Valve**

**Supplemental Table S1. Echocardiographic parameters before and after aortic valve replacement**

| <b>Echo parameters</b>                        | <b>Before surgery</b> | <b>9 months after surgery</b> | <b>2 years after surgery</b> |
|-----------------------------------------------|-----------------------|-------------------------------|------------------------------|
| Aortic valve area                             | 0.86 cm <sup>2</sup>  | 1.8 cm <sup>2</sup>           | 1.7 cm <sup>2</sup>          |
| Mean transaortic pressure gradient            | 56 mmHg               | 8 mmHg                        | 11 mmHg                      |
| Aortic regurgitation                          | Trivial               | Trivial                       | Trivial                      |
| Heart rate                                    | 52 bpm                | 62 bpm                        | 55 bpm                       |
| LV ejection fraction                          | 65 %                  | 60 %                          | 60 %                         |
| Stroke volume index                           | 56 ml/m <sup>2</sup>  | 44 ml/m <sup>2</sup>          | 48.6 ml/m <sup>2</sup>       |
| Interventricular septum thicknesses           | 12 mm                 | 10 mm                         | 9 mm                         |
| Posterior wall thicknesses                    | 12 mm                 | 10 mm                         | 8 mm                         |
| LV mass index                                 | 150 g/m <sup>2</sup>  | 114 g/m <sup>2</sup>          | 111 g/m <sup>2</sup>         |
| Relative wall thickness                       | 0.45                  | 0.39                          | 0.30                         |
| LV internal diameter in end diastole          | 53 mm                 | 53 mm                         | 58 mm                        |
| E/A                                           | 1.62                  | 1.16                          | 2.17                         |
| E/e'                                          | 6.44                  | 10.14                         | 6.10                         |
| LV global longitudinal strain                 | -17.3 %               | -17.4 %                       | -18.1 %                      |
| Apex to base global longitudinal strain ratio | 2.2                   | 1.5                           | 1.4                          |
| Average mitral s' wave velocity               | 7 cm/s                | 7.5 cm/s                      | 8.3 cm/s                     |
| Systolic pulmonary arterial pressure          | 26 mmHg               | 16 mmHg                       | 23 mmHg                      |
| Left atrium volume index                      | 40 ml/m <sup>2</sup>  | 33 ml/m <sup>2</sup>          | 37 ml/m <sup>2</sup>         |
| Right atrium                                  | normal                | normal                        | normal                       |
| TAPSE                                         | 24 mm                 | 13 mm                         | 18 mm                        |
| Tricuspid s' wave velocity                    | 14 cm/s               | 9 cm/s                        | N/A                          |

**Supplemental Figure S1. 99mTc PYP cardiac scintigraphic exam**

One hour after 99mTc PYP injection, cardiac scintigraphy turns out negative with a visual myocardial uptake 0/3 grade.

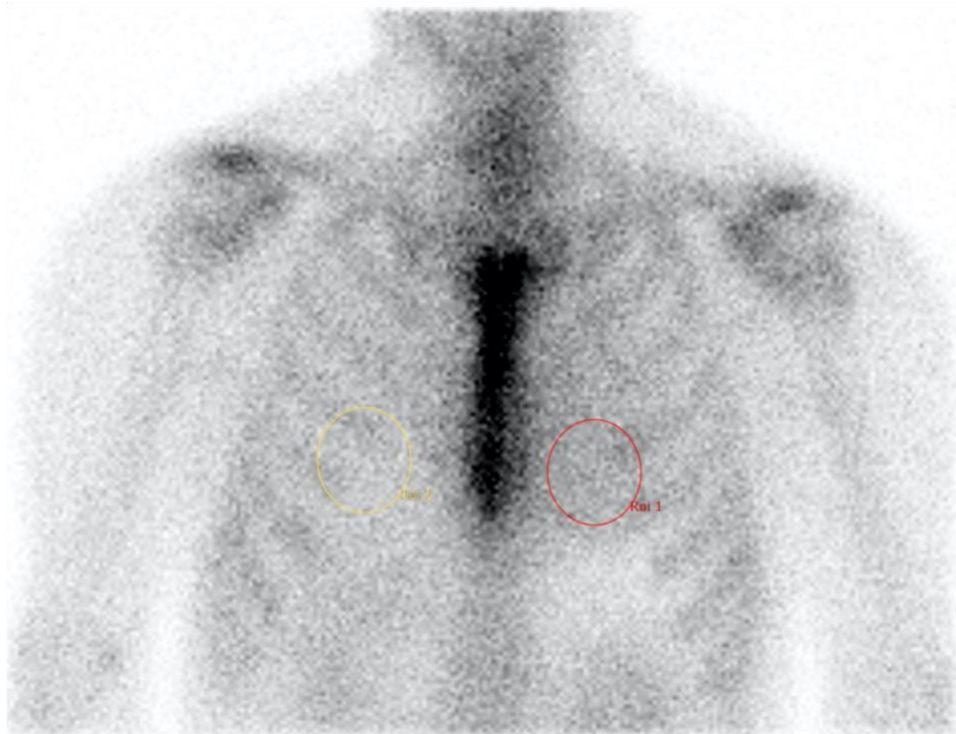

Supplement: mmc1.pdf [file mmc1.pdf]
